# Supplementary material
Source: publisher figshare collection journal article supplement (https://acs.figshare.com/ndownloader/files/22097115)
Supplement: Supplementary file 1 [file 22097115]

# Investigation of Temporal Apparent C4 Sugar Change in Manuka Honey

Anatoly Chernyshev\*, Terry Braggins

Analytica Laboratories Ltd., Ruakura Research Centre, 10 Bisley Rd, Hamilton 3240, New Zealand

## Supplementary materials

**Table S1.** The results of retesting a set of manuka honeys with Bruker Honey-Profiling™ NMR method (adopted from a conference presentation<sup>11</sup>).

| Sample #                                 | A      | B      | C      | D      | E      | F      | G      | H      |
|------------------------------------------|--------|--------|--------|--------|--------|--------|--------|--------|
| $\delta^{13}\text{C}_h$                  | -24.70 | -25.72 | -25.16 | -24.82 | -25.62 | -25.36 | -25.51 | -25.45 |
| $\delta^{13}\text{C}_p$                  | -27.06 | -27.61 | -26.91 | -26.18 | -26.61 | -26.03 | -27.24 | -26.10 |
| Apparent C4 sugar %                      | 13.6   | 10.6   | 10.2   | 8.3    | 5.9    | 4.1    | 9.9    | 4.0    |
| DHA, mmol/kg                             | 4.9    | 4.2    | 5.7    | 20.0   | 23.1   | 30.1   | 5.0    | 28.0   |
| MG, mmol/kg                              | 8.5    | 10.6   | 13.0   | 5.5    | 5.0    | 6.1    | 11.8   | 6.2    |
| HMF, mmol/kg                             | 0.9    | 0.6    | 0.7    | 0.1    | 0.1    | 0.1    | 0.7    | 0.1    |
| Bruker Honey-Profiling™ NMR test results |        |        |        |        |        |        |        |        |
| Sugar syrups                             | No     | No     | Yes    | No     | No     | No     | No     | No     |

01\_NIUE\_DHA

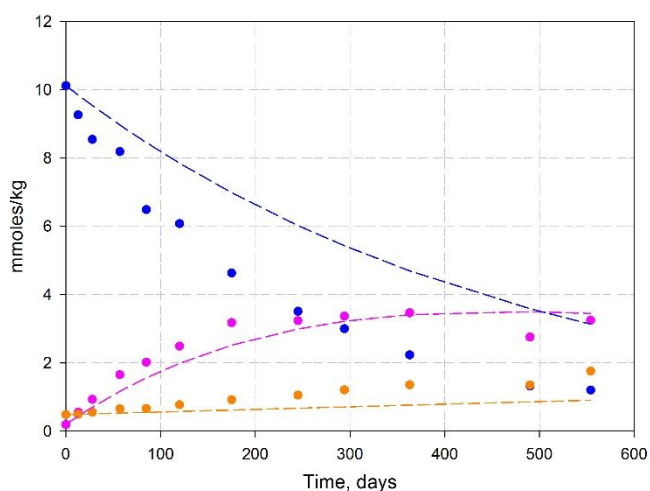

02\_CLOVER\_DHA

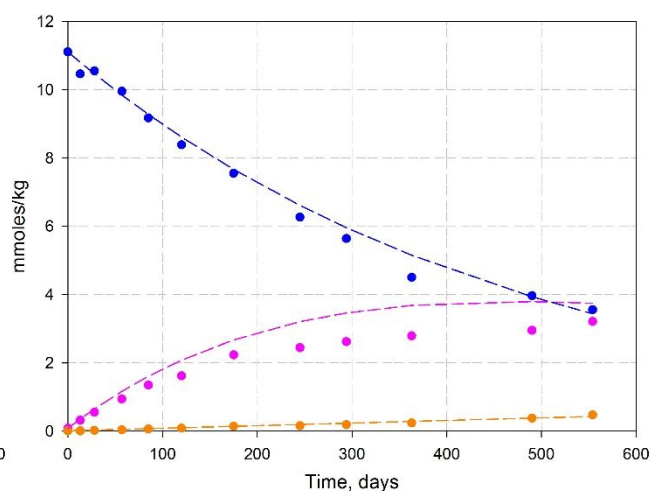

04\_MANUKA

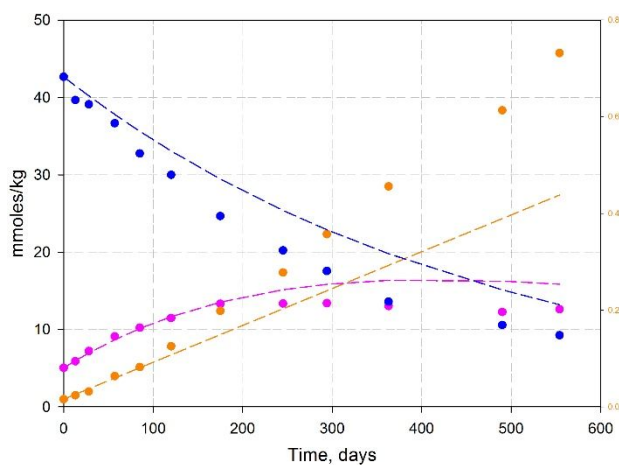

05\_MANUKA

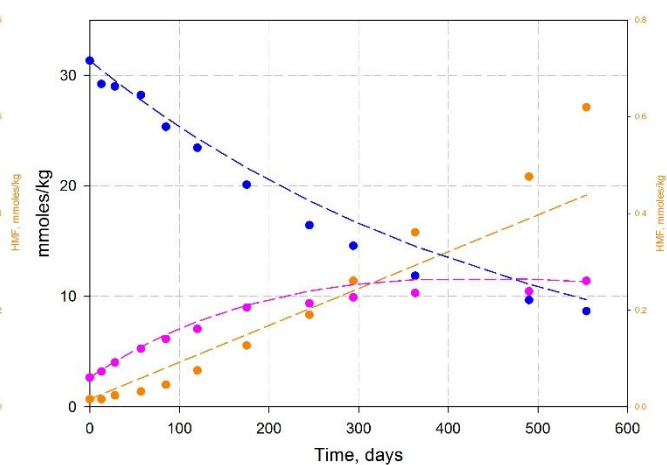

06\_MANUKA

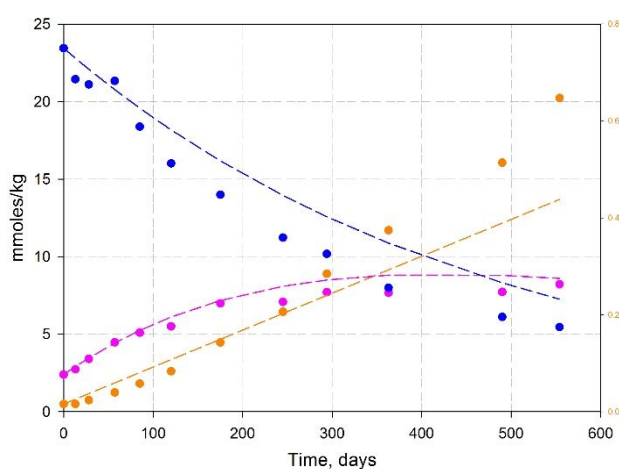

07\_MANUKA

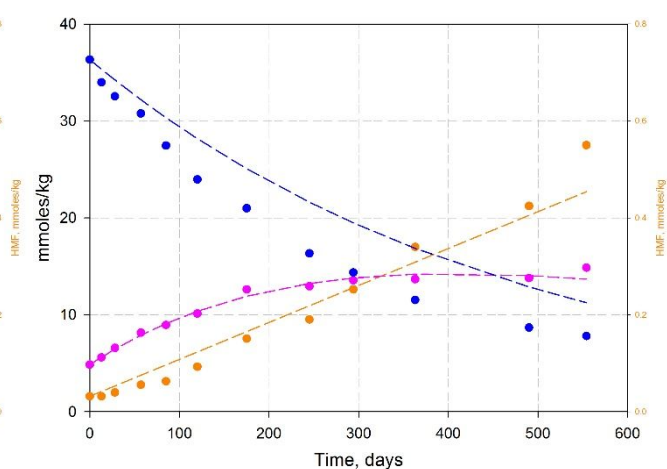

08\_MANUKA\_OLD

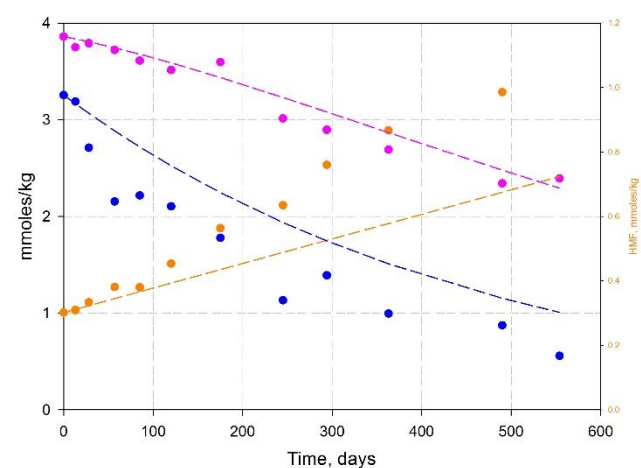

**Figure S1.** Change in concentrations of DHA (blue), MG (magenta), HMF (brown) over time in the studied honey samples. Dots — experimental values; dashed lines — forecast by Analytica's kinetic model. Sample #3 (pure clover honey) is not shown.

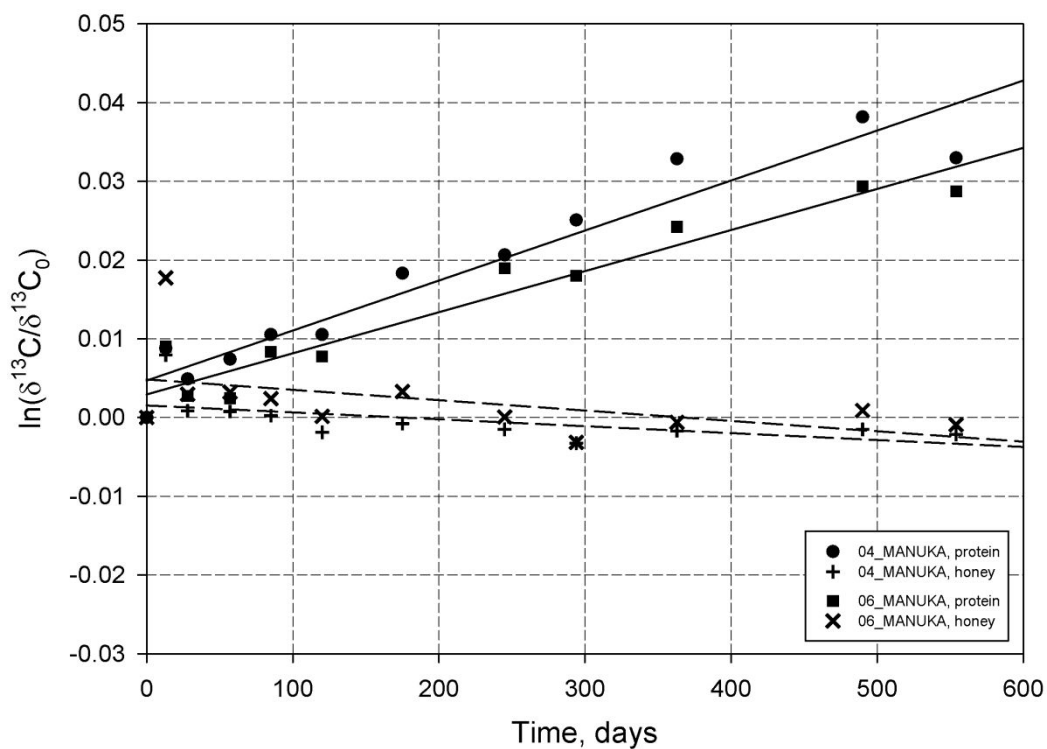

**Figure S2.** The plots of  $\ln(\delta^{13}\text{C}/\delta^{13}\text{C}_0)$  vs. time for the other two high quality manuka honeys (group 3). The grey dashes are 95% confidence intervals.

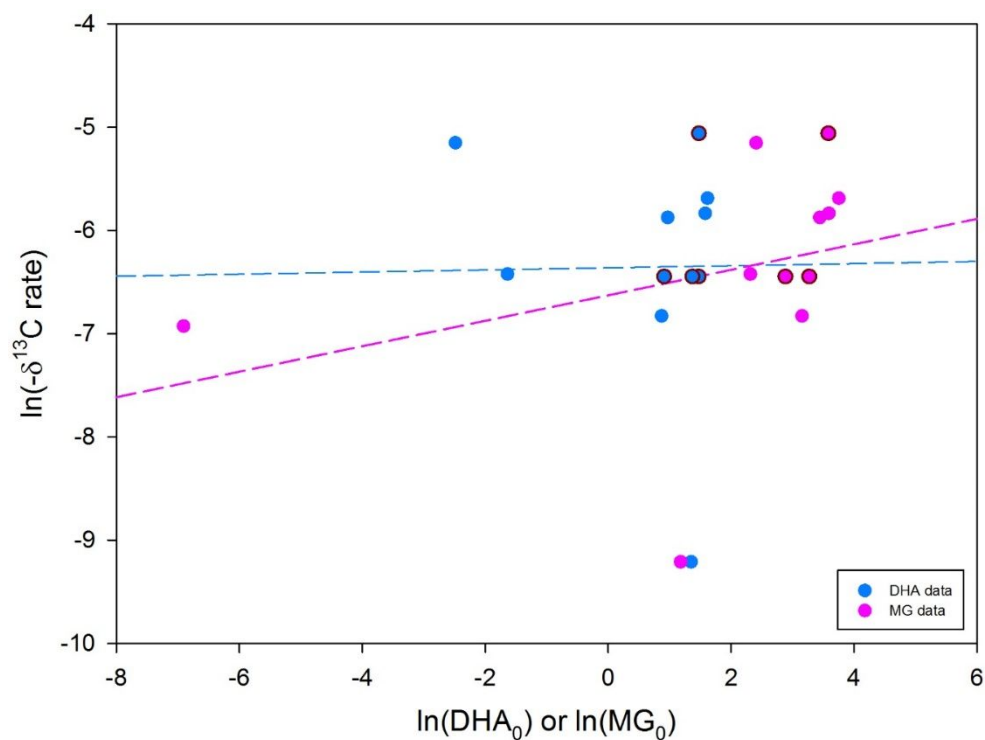

**Figure S3.** The plot of  $\ln(-d\delta^{13}\text{C}/dt)$  vs.  $\ln(\text{DHA}_0)$  and  $\ln(\text{MG}_0)$ . The plot includes the data of Rogers<sup>1</sup> (bordered circles).

01\_NIUE\_DHA

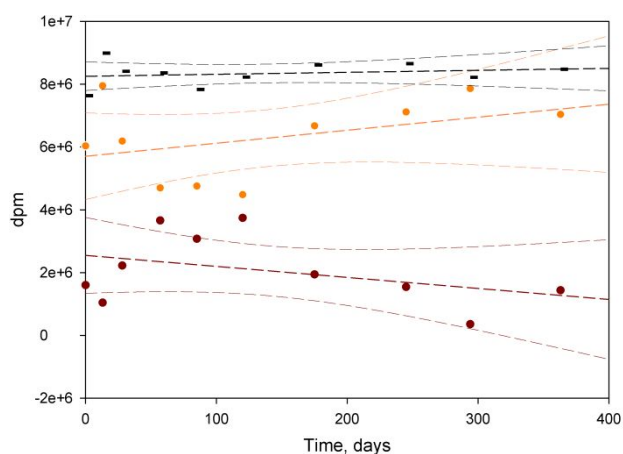

02\_CLOVER\_DHA

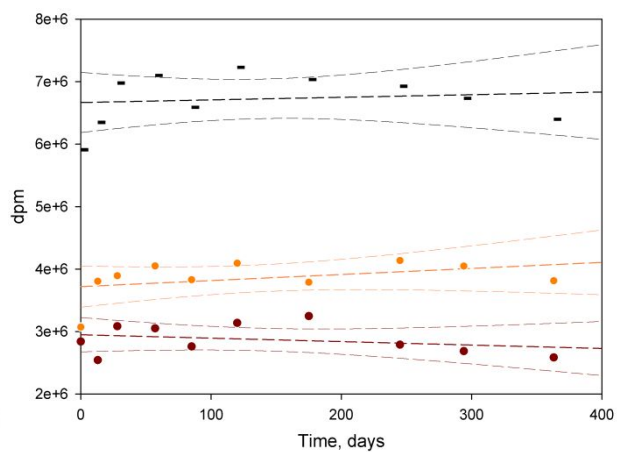

04\_MANUKA

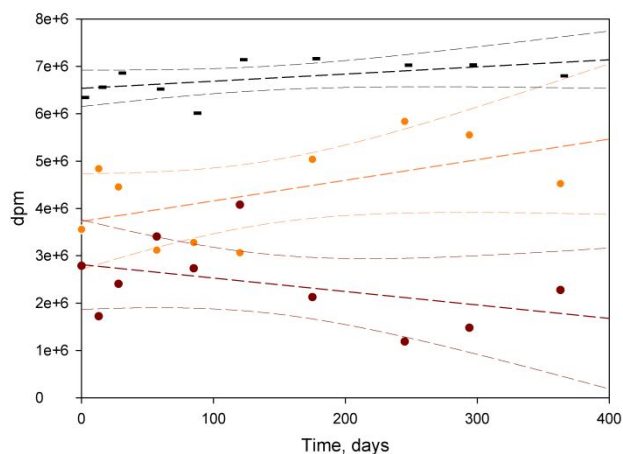

06\_MANUKA

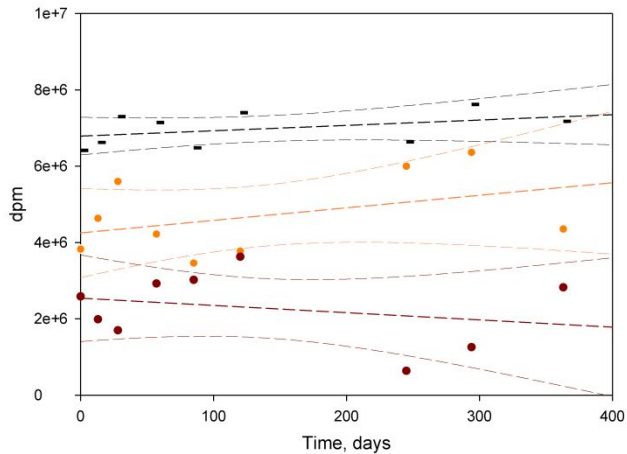

07\_MANUKA

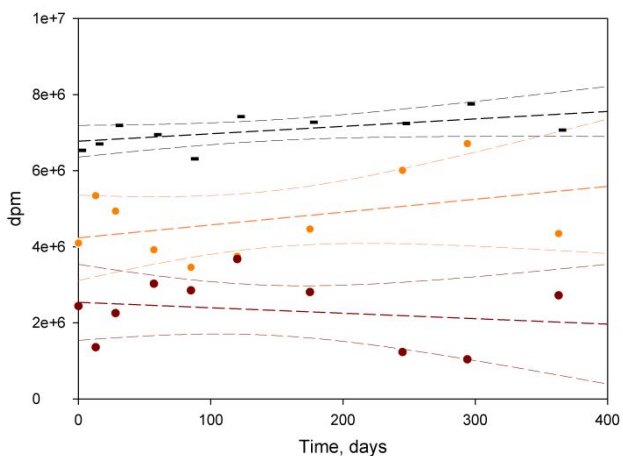

08\_MANUKA\_OLD

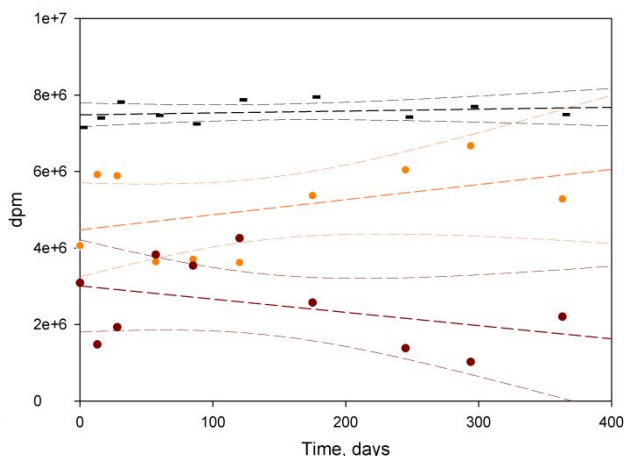

**Figure S4.** Change in scintillation counts, with 95% confidence intervals, for honey (light brown), protein (dark brown), and total (black) over time in the studied honey samples. The black dashes show the total amount of  $^{14}\text{C}$  label in the sample, and serve as a control to check in there was any loss of the labelled material during the protein precipitation.

**Table S2.** The results of isotopic headspace analysis of the honey samples.

| Sample ID                          | O <sub>2</sub> , % | CO <sub>2</sub> , ppm | δ <sup>13</sup> C |
|------------------------------------|--------------------|-----------------------|-------------------|
| Laboratory air                     | 20.5               | 770                   | -23.4             |
| 01_NIUE_DHA                        | 20.3               | 1260                  | -27.6             |
| 02_CLOVER_DHA                      | 19.2               | 1500                  | -29.8             |
| 03_CLOVER                          | 19.3               | 6530                  | -26.4             |
| 04_MANUKA                          | 18.8               | 12110                 | -35.2             |
| 05_MANUKA                          | 18.4               | 4840                  | -35.0             |
| 06_MANUKA                          | 18.0               | 12300                 | -37.8             |
| 07_MANUKA                          | 19.3               | 1200                  | -25.7             |
| 08_MANUKA_OLD                      | 19.2               | 6240                  | -34.9             |
| Fresh, non-incubated manuka honey* | 20.3               | 1540                  | -27.1             |

**Table S3.** The results of δ<sup>13</sup>C measurements in artificial honey. Highlighted bold is the component changing its isotopic composition.

| Time  | Sample                          | δ <sup>13</sup> C | σ(δ <sup>13</sup> C) |
|-------|---------------------------------|-------------------|----------------------|
| Day 0 | Artificial Honey + DHA          | -12.28            | 0.02                 |
|       | <b>Artificial Protein + DHA</b> | <b>-10.00</b>     | 0.02                 |
|       | Artificial Honey - DHA          | -12.17            | 0.07                 |
|       | Artificial Protein - DHA        | -9.99             | 0.03                 |
| Day 7 | Artificial Honey + DHA          | -12.32            | 0.04                 |
|       | <b>Artificial Protein + DHA</b> | <b>-10.71</b>     | 0.02                 |
|       | Artificial Honey - DHA          | -12.28            | 0.05                 |
|       | Artificial Protein - DHA        | -10.12            | 0.08                 |
